# Supplementary material for: Cell-free ascites from ovarian cancer patients induces Warburg metabolism and cell proliferation through TGFβ-ERK signaling
Source: Springer Nature journal article supplement (doi:10.1007/s11357-023-01056-1), 2024-01-10
Supplement: MOESM1 [file 11357_2023_1056_MOESM1_ESM.pdf]

1 **Supplementary materials for Szeőcs et al. “Cell-free ascites from ovarian cancer**  
2 **patients induces Warburg metabolism and cell proliferation through TGFβ-ERK**  
3 **signaling”**

4

5 **Supplementary Figures**

6 **Supplementary Figure 1. The depiction of the results of the biological process reactome**  
7 **pathway analysis**

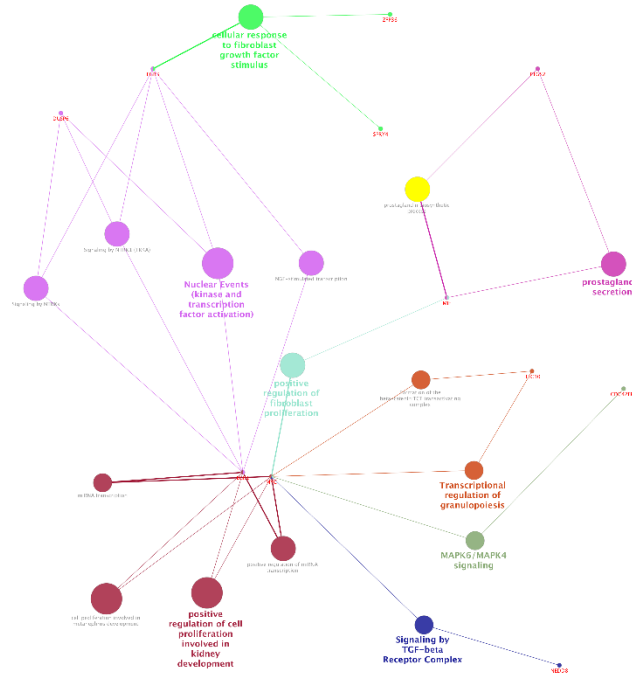

8

9

10 **Supplementary Figure 2. The depiction of the results of the KEGG pathway analysis**



**Supplemental Table 1. The list of the genes with dysregulated mRNA expression upon ascites treatment in A2780 cells**

| Regulation | True FC   | Gene ID         | p            | Gene Symbol | Description                                                                                      |
|------------|-----------|-----------------|--------------|-------------|--------------------------------------------------------------------------------------------------|
| up         | 2,9477072 | ENSG00000200237 | 3.6726982E-4 | SNORA70     | Small nucleolar RNA SNORA70 [Source:RFAM;Acc:RF00156]                                            |
| up         | 2,7018178 | ENSG00000229780 | 0.0016217054 | UBE2Q1-AS1  | UBE2Q1 antisense RNA 1 [Source:HGNC Symbol;Acc:HGNC:40722]                                       |
| up         | 2,5710666 | ENSG00000120738 | 0.0025615287 | EGR1        | early growth response 1 [Source:HGNC Symbol;Acc:HGNC:3238]                                       |
| up         | 2,192126  | ENSG00000264425 | 6.1804353E-6 | MIR4653     | microRNA 4653 [Source:HGNC Symbol;Acc:HGNC:41562]                                                |
| up         | 2,179043  | ENSG00000266563 | 0.0076324726 | EIF1P5      | eukaryotic translation initiation factor 1 pseudogene 5 [Source:HGNC Symbol;Acc:HGNC:49618]      |
| up         | 2,1386595 | ENSG00000179388 | 3.9478986E-5 | EGR3        | early growth response 3 [Source:HGNC Symbol;Acc:HGNC:3240]                                       |
| up         | 1,9871191 | ENSG00000230165 | 0.01687274   | AURKAPS2    | aurora kinase A pseudogene 2 [Source:HGNC Symbol;Acc:HGNC:18612]                                 |
| up         | 1,9435551 | ENSG00000232797 | 0.023352714  | FAM207CP    | family with sequence similarity 207 member C, pseudogene [Source:HGNC Symbol;Acc:HGNC:42676]     |
| up         | 1,7827168 | ENSG00000207187 | 0.02124332   | SNORA64     | Small nucleolar RNA SNORA64/SNORA10 family [Source:RFAM;Acc:RF00264]                             |
| up         | 1,7094568 | ENSG00000073756 | 5.1847426E-4 | PTGS2       | prostaglandin-endoperoxide synthase 2 [Source:HGNC Symbol;Acc:HGNC:9605]                         |
| up         | 1,6764557 | ENSG00000264585 | 0.041079063  | MIR4449     | microRNA 4449 [Source:HGNC Symbol;Acc:HGNC:41864]                                                |
| up         | 1,6551335 | ENSG00000237786 | 2.2137059E-4 | GFOD1-AS1   | GFOD1 antisense RNA 1 [Source:HGNC Symbol;Acc:HGNC:40956]                                        |
| up         | 1,6327174 | ENSG00000221420 | 6.6429275E-5 | SNORA81     | small nucleolar RNA, H/ACA box 81 [Source:HGNC Symbol;Acc:HGNC:32667]                            |
| up         | 1,6224425 | ENSG00000271550 | 0.0029100254 | BNIP3P11    | BCL2 interacting protein 3 pseudogene 11 [Source:HGNC Symbol;Acc:HGNC:49724]                     |
| up         | 1,6073337 | ENSG00000167617 | 0.0022706757 | CDC42EP5    | CDC42 effector protein 5 [Source:HGNC Symbol;Acc:HGNC:17408]                                     |
| up         | 1,5232219 | ENSG00000267541 | 0.017208245  | MTCO2P2     | mitochondrially encoded cytochrome c oxidase II pseudogene 2 [Source:HGNC Symbol;Acc:HGNC:25354] |
| up         | 1,5137937 | ENSG00000265806 | 0.03795629   | MIR4292     | microRNA 4292 [Source:HGNC Symbol;Acc:HGNC:38348]                                                |
| up         | 1,5077088 | ENSG00000231940 | 0.04937398   | RPS7P3      | ribosomal protein S7 pseudogene 3 [Source:HGNC Symbol;Acc:HGNC:36518]                            |
| up         | 1,4689386 | ENSG00000183055 | 0.011377843  | FAM133CP    | family with sequence similarity 133 member C, pseudogene [Source:HGNC Symbol;Acc:HGNC:44190]     |

|    |           |                 |              |           |                                                                                                  |
|----|-----------|-----------------|--------------|-----------|--------------------------------------------------------------------------------------------------|
| up | 1,4523611 | ENSG00000277985 | 0.0076470156 | SNORA67   | small nucleolar RNA, H/ACA box 67 [Source:HGNC Symbol;Acc:HGNC:10224]                            |
| up | 1,4276246 | ENSG00000275559 | 0.014187338  | DLEU2_6   | Deleted in lymphocytic leukemia 2 conserved region 6 [Source:RFAM;Acc:RF02110]                   |
| up | 1,4275063 | ENSG00000214832 | 0.032082353  | UPF3AP2   | UPF3A pseudogene 2 [Source:HGNC Symbol;Acc:HGNC:30567]                                           |
| up | 1,4143887 | ENSG00000164845 | 0.0032925047 | FAM86FP   | family with sequence similarity 86 member F, pseudogene [Source:HGNC Symbol;Acc:HGNC:42357]      |
| up | 1,4070482 | ENSG00000228288 | 0.001366682  | PCAT6     | prostate cancer associated transcript 6 (non-protein coding) [Source:HGNC Symbol;Acc:HGNC:43714] |
| up | 1,4037645 | ENSG00000128016 | 0.02235977   | ZFP36     | ZFP36 ring finger protein [Source:HGNC Symbol;Acc:HGNC:12862]                                    |
| up | 1,3625283 | ENSG00000104044 | 0.011527806  | OCA2      | OCA2 melanosomal transmembrane protein [Source:HGNC Symbol;Acc:HGNC:8101]                        |
| up | 1,3567642 | ENSG00000225263 | 0.023512835  | PCDH9-AS3 | PCDH9 antisense RNA 3 [Source:HGNC Symbol;Acc:HGNC:40427]                                        |
| up | 1,3556095 | ENSG00000223768 | 0.005666636  | LINC00205 | long intergenic non-protein coding RNA 205 [Source:HGNC Symbol;Acc:HGNC:16420]                   |
| up | 1,3456439 | ENSG00000213977 | 0.04334673   | TAX1BP3   | Tax1 binding protein 3 [Source:HGNC Symbol;Acc:HGNC:30684]                                       |
| up | 1,3336275 | ENSG00000115641 | 0.003807424  | FHL2      | four and a half LIM domains 2 [Source:HGNC Symbol;Acc:HGNC:3703]                                 |
| up | 1,3330634 | ENSG00000205583 | 0.048959848  | STAG3L1   | stromal antigen 3-like 1 (pseudogene) [Source:HGNC Symbol;Acc:HGNC:33852]                        |
| up | 1,3328687 | ENSG00000224953 | 0.03022431   | SRIP3     | sorcin pseudogene 3 [Source:HGNC Symbol;Acc:HGNC:38735]                                          |
| up | 1,3266606 | ENSG00000147804 | 0.016489785  | SLC39A4   | solute carrier family 39 member 4 [Source:HGNC Symbol;Acc:HGNC:17129]                            |
| up | 1,3235443 | ENSG00000233111 | 0.046089772  | RAB1C     | RAB1C, member RAS oncogene family pseudogene [Source:HGNC Symbol;Acc:HGNC:23683]                 |
| up | 1,3233577 | ENSG00000139318 | 0.0044674734 | DUSP6     | dual specificity phosphatase 6 [Source:HGNC Symbol;Acc:HGNC:3072]                                |
| up | 1,3196259 | ENSG00000142871 | 0.00361219   | CYR61     | cysteine rich angiogenic inducer 61 [Source:HGNC Symbol;Acc:HGNC:2654]                           |
| up | 1,3176638 | ENSG00000236044 | 0.0014407363 | FABP5P2   | fatty acid binding protein 5 pseudogene 2 [Source:HGNC Symbol;Acc:HGNC:31060]                    |
| up | 1,3144366 | ENSG00000187678 | 0.03410386   | SPRY4     | sprouty RTK signaling antagonist 4 [Source:HGNC Symbol;Acc:HGNC:15533]                           |

|      |           |                 |             |           |                                                                                         |
|------|-----------|-----------------|-------------|-----------|-----------------------------------------------------------------------------------------|
| up   | 1,3125435 | ENSG00000276314 | 0.025724834 | SNORD107  | small nucleolar RNA, C/D box 107 [Source:HGNC Symbol;Acc:HGNC:32771]                    |
| up   | 1,3071051 | ENSG00000237883 | 0.039194833 | DGUOK-AS1 | DGUOK antisense RNA 1 [Source:HGNC Symbol;Acc:HGNC:43441]                               |
| up   | 1,2937657 | ENSG00000104447 | 0.016541978 | TRPS1     | transcriptional repressor GATA binding 1 [Source:HGNC Symbol;Acc:HGNC:12340]            |
| up   | 1,2896274 | ENSG00000231468 | 0.032214776 | PRDX3P2   | peroxiredoxin 3 pseudogene 2 [Source:HGNC Symbol;Acc:HGNC:39265]                        |
| up   | 1,2879456 | ENSG00000231707 | 0.035567768 | PABPC1P1  | poly(A) binding protein cytoplasmic 1 pseudogene 1 [Source:HGNC Symbol;Acc:HGNC:8558]   |
| up   | 1,2853307 | ENSG00000278828 | 0.019756837 | HIST1H3H  | histone cluster 1 H3 family member h [Source:HGNC Symbol;Acc:HGNC:4775]                 |
| up   | 1,2839777 | ENSG00000136997 | 0.014050976 | MYC       | v-myc avian myelocytomatosis viral oncogene homolog [Source:HGNC Symbol;Acc:HGNC:7553]  |
| up   | 1,267008  | ENSG00000215784 | 0.021528244 | FAM72D    | family with sequence similarity 72 member D [Source:HGNC Symbol;Acc:HGNC:33593]         |
| up   | 1,2619482 | ENSG00000159840 | 0.030144261 | ZYX       | zyxin [Source:HGNC Symbol;Acc:HGNC:13200]                                               |
| up   | 1,2524849 | ENSG00000218996 | 0.023981577 | ARL4AP5   | ADP ribosylation factor like GTPase 4A pseudogene 5 [Source:HGNC Symbol;Acc:HGNC:52374] |
| up   | 1,2479565 | ENSG00000155090 | 0.035589546 | KLF10     | Kruppel like factor 10 [Source:HGNC Symbol;Acc:HGNC:11810]                              |
| up   | 1,2470483 | ENSG00000181227 | 0.034849685 | DLSTP1    | dihydrolipoamide S-succinyltransferase pseudogene 1 [Source:HGNC Symbol;Acc:HGNC:2912]  |
| down | 1,2514668 | ENSG00000119938 | 0.04149522  | PPP1R3C   | protein phosphatase 1 regulatory subunit 3C [Source:HGNC Symbol;Acc:HGNC:9293]          |
| down | -1,266786 | ENSG00000283277 | 0.045701448 | FBXO31    | F-box protein 31 [Source:HGNC Symbol;Acc:HGNC:16510]                                    |
| down | 1,2669684 | ENSG00000240204 | 0.010574033 | SMKR1     | small lysine rich protein 1 [Source:HGNC Symbol;Acc:HGNC:43561]                         |
| down | 1,2720221 | ENSG00000253327 | 0.010656143 | RAD21-AS1 | RAD21 antisense RNA 1 [Source:HGNC Symbol;Acc:HGNC:32158]                               |
| down | 1,2891599 | ENSG00000221883 | 0.027453175 | ARIH2OS   | ariadne homolog 2 opposite strand [Source:HGNC Symbol;Acc:HGNC:34425]                   |
| down | 1,2986972 | ENSG00000236152 | 0.017886551 | MRPS36P1  | mitochondrial ribosomal protein S36 pseudogene 1 [Source:HGNC Symbol;Acc:HGNC:29771]    |
| down | 1,3027892 | ENSG00000271672 | 0.047135614 | DUXAP8    | double homeobox A pseudogene 8 [Source:HGNC Symbol;Acc:HGNC:32187]                      |

|      |           |   |                 |              |            |                                                                                                             |
|------|-----------|---|-----------------|--------------|------------|-------------------------------------------------------------------------------------------------------------|
| down | 1,3240199 | - | ENSG00000277072 | 0.027823128  | STAG3L2    | stromal antigen 3-like 2 (pseudogene) [Source:HGNC Symbol;Acc:HGNC:33886]                                   |
| down | 1,3281302 | - | ENSG00000267691 | 0.010456534  | SHC1P2     | SHC adaptor protein 1 pseudogene 2 [Source:HGNC Symbol;Acc:HGNC:10842]                                      |
| down | 1,3439653 | - | ENSG00000276168 | 0.022338718  | RN7SL1     | RNA, 7SL, cytoplasmic 1 [Source:HGNC Symbol;Acc:HGNC:10038]                                                 |
| down | 1,3547242 | - | ENSG00000254835 | 0.04004662   | RNF185-AS1 | RNF185 antisense RNA 1 [Source:HGNC Symbol;Acc:HGNC:41161]                                                  |
| down | 1,3561497 | - | ENSG00000226981 | 0.02642097   | ABHD17AP6  | abhydrolase domain containing 17A pseudogene 6 [Source:HGNC Symbol;Acc:HGNC:34044]                          |
| down | -1,378499 | - | ENSG00000257446 | 0.0017799074 | ZNF878     | zinc finger protein 878 [Source:HGNC Symbol;Acc:HGNC:37246]                                                 |
| down | 1,3803091 | - | ENSG00000236679 | 0.041618254  | RPL23AP24  | ribosomal protein L23a pseudogene 24 [Source:HGNC Symbol;Acc:HGNC:36176]                                    |
| down | 1,3877183 | - | ENSG00000240972 | 0.0033792865 | MIF        | macrophage migration inhibitory factor (glycosylation-inhibiting factor) [Source:HGNC Symbol;Acc:HGNC:7097] |
| down | 1,4054805 | - | ENSG00000263740 | 6.9457164E-6 | RN7SL4P    | RNA, 7SL, cytoplasmic 4, pseudogene [Source:HGNC Symbol;Acc:HGNC:10039]                                     |
| down | 1,4119443 | - | ENSG00000129559 | 0.0014465789 | NEDD8      | neural precursor cell expressed, developmentally down-regulated 8 [Source:HGNC Symbol;Acc:HGNC:7732]        |
| down | 1,4263561 | - | ENSG00000274012 | 0.0010322204 | RN7SL2     | RNA, 7SL, cytoplasmic 2 [Source:HGNC Symbol;Acc:HGNC:23134]                                                 |
| down | 1,4359555 | - | ENSG00000225423 | 0.009289591  | TNPO1P1    | transportin 1 pseudogene 1 [Source:HGNC Symbol;Acc:HGNC:45120]                                              |
| down | 1,4372994 | - | ENSG00000231789 | 1.5836447E-6 | PIK3CD-AS2 | PIK3CD antisense RNA 2 [Source:HGNC Symbol;Acc:HGNC:51334]                                                  |
| down | 1,4405223 | - | ENSG00000172058 | 0.037489835  | SERF1A     | small EDRK-rich factor 1A [Source:HGNC Symbol;Acc:HGNC:10755]                                               |
| down | 1,4682686 | - | ENSG00000104894 | 0.0155963795 | CD37       | CD37 molecule [Source:HGNC Symbol;Acc:HGNC:1666]                                                            |
| down | 1,4721034 | - | ENSG00000148290 | 0.01686941   | SURF1      | SURF1, cytochrome c oxidase assembly factor [Source:HGNC Symbol;Acc:HGNC:11474]                             |
| down | -1,583577 | - | ENSG00000250412 | 0.03880814   | KLHL2P1    | kelch like family member 2 pseudogene 1 [Source:HGNC Symbol;Acc:HGNC:44046]                                 |
| down | -1,612305 | - | ENSG00000231500 | 0.02033639   | RPS18      | ribosomal protein S18 [Source:HGNC Symbol;Acc:HGNC:10401]                                                   |

|      |           |   |                 |              |             |                                                                                            |
|------|-----------|---|-----------------|--------------|-------------|--------------------------------------------------------------------------------------------|
| down | 1,6299042 | - | ENSG00000200913 | 0.04580613   | SNORD46     | small nucleolar RNA, C/D box 46 [Source:HGNC Symbol;Acc:HGNC:10186]                        |
| down | 1,6430213 | - | ENSG00000278771 | 0.009891675  | Metazoa_SRP | Metazoan signal recognition particle RNA [Source:RFAM;Acc:RF00017]                         |
| down | 1,6745209 | - | ENSG00000231240 | 0.02600546   | KLF2P1      | Kruppel like factor 2 pseudogene 1 [Source:HGNC Symbol;Acc:HGNC:49280]                     |
| down | 1,7078915 | - | ENSG00000259419 | 0.009440136  | HNRNPCP3    | heterogeneous nuclear ribonucleoprotein C pseudogene 3 [Source:HGNC Symbol;Acc:HGNC:48815] |
| down | -1,889383 | - | ENSG00000221184 | 0.0024979    | MIR1254-1   | microRNA 1254-1 [Source:HGNC Symbol;Acc:HGNC:35319]                                        |
| down | 1,9506652 | - | ENSG00000205544 | 0.036315683  | TMEM256     | transmembrane protein 256 [Source:HGNC Symbol;Acc:HGNC:28618]                              |
| down | 2,0208325 | - | ENSG00000255526 | 9.0364943E-4 | NEDD8-MDP1  | NEDD8-MDP1 readthrough [Source:HGNC Symbol;Acc:HGNC:39551]                                 |
| down | 2,6719124 | - | ENSG00000212385 | 0.004469624  | RNU6-817P   | RNA, U6 small nuclear 817, pseudogene [Source:HGNC Symbol;Acc:HGNC:47780]                  |
| down | 3,5985348 | - | ENSG00000278039 | 0.043509685  | Xist_exon1  | X-chromosome inactivation gene exon 1 [Source:RFAM;Acc:RF01880]                            |

13

14 **Supplementary Table 2. The results of the biological process reactome pathway analysis**

15

Non corrected p values are indicated in the table.

| ID            | Term                                                   | Ontology Source                                                 | p value   | Associated Genes     |
|---------------|--------------------------------------------------------|-----------------------------------------------------------------|-----------|----------------------|
| R-HSA:5687128 | MAPK6/MAPK4 signaling                                  | REACTOME_Pathways_25.05.2022                                    | 0,0087044 | [CDC42EP5, MYC]      |
| GO:0044344    | cellular response to fibroblast growth factor stimulus | GO_BiologicalProcess-EBI-UniProt-GOA-ACAP-ARAP_25.05.2022_00h00 | 0,0007243 | [EGR3, SPRY4, ZFP36] |
| GO:0048146    | positive regulation of fibroblast proliferation        | GO_BiologicalProcess-EBI-UniProt-GOA-ACAP-ARAP_25.05.2022_00h00 | 0,0039164 | [MIF, MYC]           |

|               |                                                                          |                                                                 |           |                     |
|---------------|--------------------------------------------------------------------------|-----------------------------------------------------------------|-----------|---------------------|
| R-HSA:170834  | Signaling by TGF-beta Receptor Complex                                   | REACTOME_Pathways_25.05.2022                                    | 0,0087044 | [MYC, NEDD8]        |
| GO:0032310    | prostaglandin secretion                                                  | GO_BiologicalProcess-EBI-UniProt-GOA-ACAP-ARAP_25.05.2022_00h00 | 0,0005483 | [MIF, PTGS2]        |
| GO:0001516    | prostaglandin biosynthetic process                                       | GO_BiologicalProcess-EBI-UniProt-GOA-ACAP-ARAP_25.05.2022_00h00 | 0,0013943 | [MIF, PTGS2]        |
| R-HSA:201722  | Formation of the beta-catenin:TCF transactivating complex                | REACTOME_Pathways_25.05.2022                                    | 0,0090846 | [H3C10, MYC]        |
| R-HSA:9616222 | Transcriptional regulation of granulopoiesis                             | REACTOME_Pathways_25.05.2022                                    | 0,0088936 | [H3C10, MYC]        |
| R-HSA:166520  | Signaling by NTRKs                                                       | REACTOME_Pathways_25.05.2022                                    | 0,0012172 | [DUSP6, EGR1, EGR3] |
| R-HSA:187037  | Signaling by NTRK1 (TRKA)                                                | REACTOME_Pathways_25.05.2022                                    | 0,0007821 | [DUSP6, EGR1, EGR3] |
| R-HSA:198725  | Nuclear Events (kinase and transcription factor activation)              | REACTOME_Pathways_25.05.2022                                    | 0,0001207 | [DUSP6, EGR1, EGR3] |
| R-HSA:9031628 | NGF-stimulated transcription                                             | REACTOME_Pathways_25.05.2022                                    | 0,0017297 | [EGR1, EGR3]        |
| GO:0072203    | cell proliferation involved in metanephros development                   | GO_BiologicalProcess-EBI-UniProt-GOA-ACAP-ARAP_25.05.2022_00h00 | 0,0001320 | [EGR1, MYC]         |
| GO:1901724    | positive regulation of cell proliferation involved in kidney development | GO_BiologicalProcess-EBI-UniProt-GOA-ACAP-ARAP_25.05.2022_00h00 | 0,0000865 | [EGR1, MYC]         |
| GO:0061614    | miRNA transcription                                                      | GO_BiologicalProcess-EBI-UniProt-GOA-ACAP-ARAP_25.05.2022_00h00 | 0,0050214 | [EGR1, MYC]         |

|            |                                            |                                                                 |           |             |
|------------|--------------------------------------------|-----------------------------------------------------------------|-----------|-------------|
| GO:1902895 | positive regulation of miRNA transcription | GO_BiologicalProcess-EBI-UniProt-GOA-ACAP-ARAP_25.05.2022_00h00 | 0,0027183 | [EGR1, MYC] |
|------------|--------------------------------------------|-----------------------------------------------------------------|-----------|-------------|

16

17 **Supplementary Table 3. The results of the KEGG pathway analysis**

18 Non corrected p values are indicated in the table.

| ID         | Term                                                                     | Ontology Source                                                 | p value | Associated Genes     |
|------------|--------------------------------------------------------------------------|-----------------------------------------------------------------|---------|----------------------|
| GO:0044344 | cellular response to fibroblast growth factor stimulus                   | GO_BiologicalProcess-EBI-UniProt-GOA-ACAP-ARAP_25.05.2022_00h00 | 0,00079 | [EGR3, SPRY4, ZFP36] |
| GO:0048146 | positive regulation of fibroblast proliferation                          | GO_BiologicalProcess-EBI-UniProt-GOA-ACAP-ARAP_25.05.2022_00h00 | 0,00415 | [MIF, MYC]           |
| KEGG:05221 | Acute myeloid leukemia                                                   | KEGG_25.05.2022                                                 | 0,00533 | [DUSP6, MYC]         |
| KEGG:05222 | Small cell lung cancer                                                   | KEGG_25.05.2022                                                 | 0,00983 | [MYC, PTGS2]         |
| GO:0032310 | prostaglandin secretion                                                  | GO_BiologicalProcess-EBI-UniProt-GOA-ACAP-ARAP_25.05.2022_00h00 | 0,00058 | [MIF, PTGS2]         |
| GO:0001516 | prostaglandin biosynthetic process                                       | GO_BiologicalProcess-EBI-UniProt-GOA-ACAP-ARAP_25.05.2022_00h00 | 0,00148 | [MIF, PTGS2]         |
| GO:0072203 | cell proliferation involved in metanephros development                   | GO_BiologicalProcess-EBI-UniProt-GOA-ACAP-ARAP_25.05.2022_00h00 | 0,00014 | [EGR1, MYC]          |
| GO:1901724 | positive regulation of cell proliferation involved in kidney development | GO_BiologicalProcess-EBI-UniProt-GOA-ACAP-ARAP_25.05.2022_00h00 | 0,00009 | [EGR1, MYC]          |
| GO:0061614 | miRNA transcription                                                      | GO_BiologicalProcess-EBI-UniProt-GOA-ACAP-ARAP_25.05.2022_00h00 | 0,00533 | [EGR1, MYC]          |

|            |                                            |                                                                 |         |             |
|------------|--------------------------------------------|-----------------------------------------------------------------|---------|-------------|
| GO:1902895 | positive regulation of miRNA transcription | GO_BiologicalProcess-EBI-UniProt-GOA-ACAP-ARAP_25.05.2022_00h00 | 0,00288 | [EGR1, MYC] |
|------------|--------------------------------------------|-----------------------------------------------------------------|---------|-------------|

19

20
